# Supplementary material for: Reversible modulation of photoenergy in Sm-doped (K0.5Na0.5)NbO3 transparent ceramics via photochromic behavior
Source: Royal Society of Chemistry journal article supplement (doi:10.1039/c9ta05936a), 2019-01-01
Supplement: c9ta05936a1.pdf [file c9ta05936a1.pdf]

Electronic Supplementary Material (ESI) for Journal of Materials Chemistry A.  
This journal is © The Royal Society of Chemistry 2019

## Supporting Information

### **Reversible modulation of photoenergy in Sm-doped (K<sub>0.5</sub>Na<sub>0.5</sub>)NbO<sub>3</sub> transparent ceramics via photochromic behavior**

Jinfeng Lin<sup>a</sup>, Yang Zhou<sup>a</sup>, Qiling Lu<sup>a</sup>, Xiao Wu<sup>a,\*</sup>, Cong Lin<sup>a</sup>, Tengfei Lin<sup>a</sup>, Kan-Hao  
Xue<sup>b</sup>, Xiangshui Miao<sup>b</sup>, Baisheng Sa<sup>a,\*</sup>, and Zhimei Sun<sup>c</sup>

---

<sup>a</sup> Key Laboratory of Eco-materials Advanced Technology, College of Materials  
Science and Engineering, Fuzhou University, Fuzhou, China

E-mail addresses: [wuxiao@fzu.edu.cn](mailto:wuxiao@fzu.edu.cn) (X. Wu), [bssa@fzu.edu.cn](mailto:bssa@fzu.edu.cn) (B. Sa)

<sup>b</sup> Wuhan National Laboratory for Optoelectronics, School of Optical and Electronic  
Information, Huazhong University of Science and Technology, Wuhan 430074, China

<sup>c</sup> School of Materials Science and Engineering and Center for Integrated  
Computational Materials Science, International Research Institute for  
Multidisciplinary Science, Beihang University, Beijing 100191, PR China

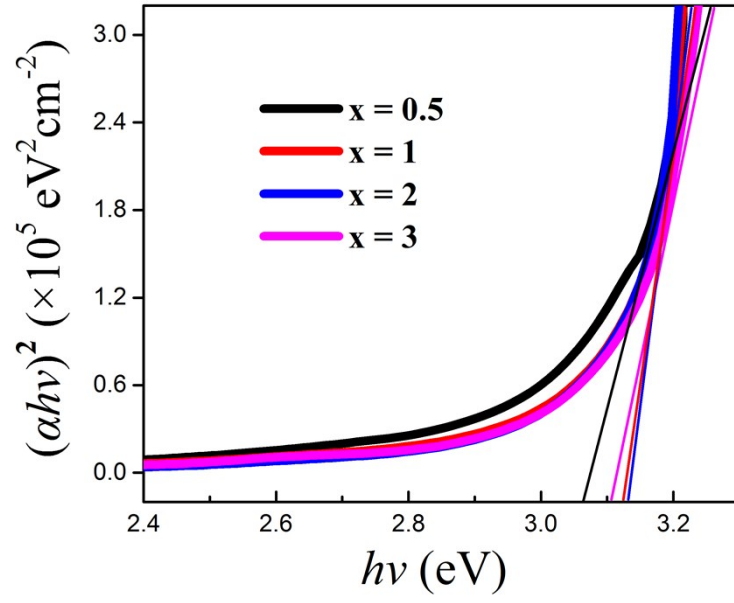

**Fig. S1** The plots of  $(\alpha h\nu)^2$  versus  $h\nu$ , energy band gap ( $E_g$ ) for the KNN-Sm-x ceramics.

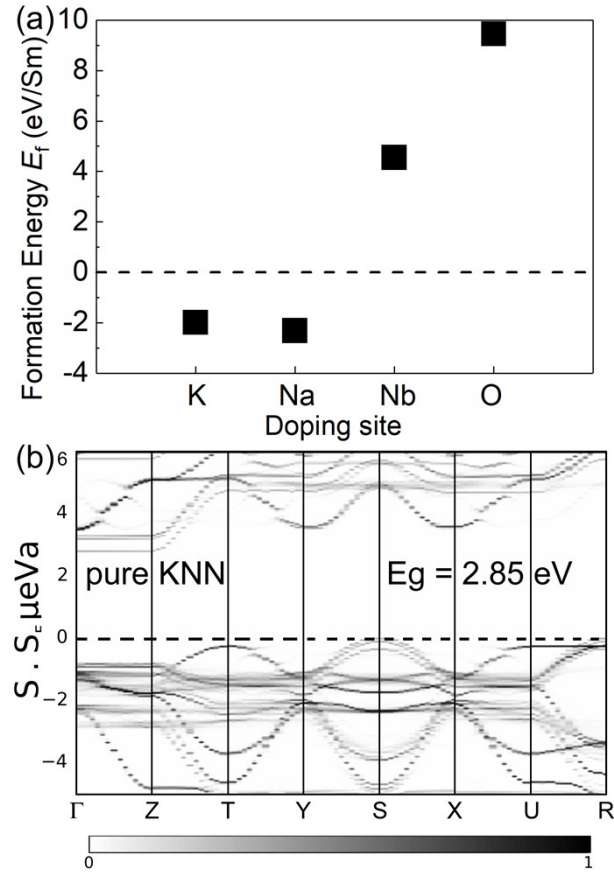

**Fig. S2** (a) The formation energy of Sm-doped KNN with different Sm-doping sites.

(b) The unfolded band structure of pure KNN.

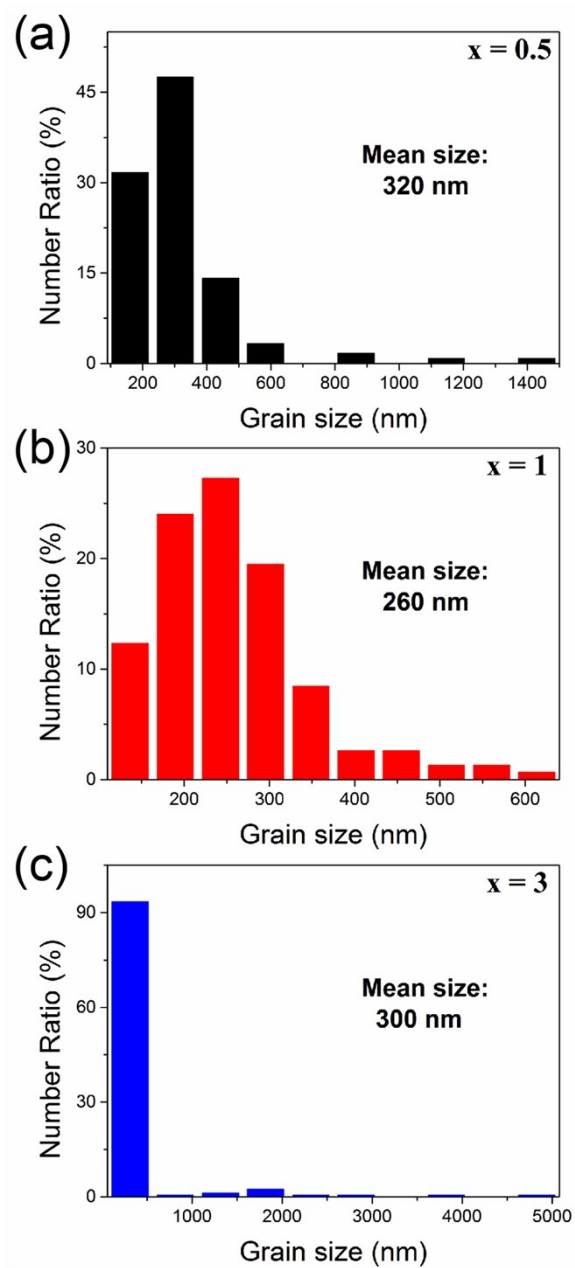

**Fig. S3** The columnar maps of the grain size distribution and mean size of the KNN-Sm-x ceramics, (a)  $x = 0.5$ , (b)  $x = 1$  and (c)  $x = 3$ .

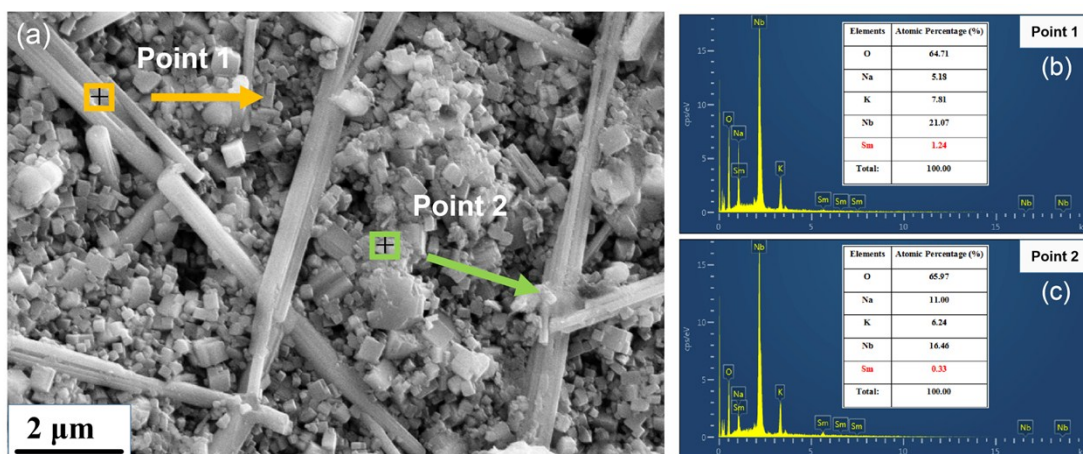

**Fig. S4** (a) The EDS analysis from the SEM image of KNN-Sm-3, (b) and (c) are the element contents of different shaped grains for point 1 and point 2, respectively.

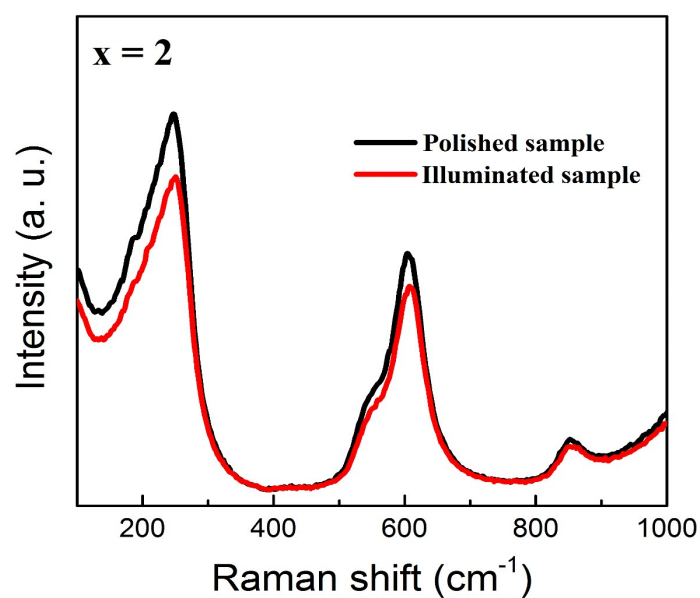

**Fig. S5** Raman spectra of the polished KNN-Sm-x sample with  $x = 2$  before and after illumination.

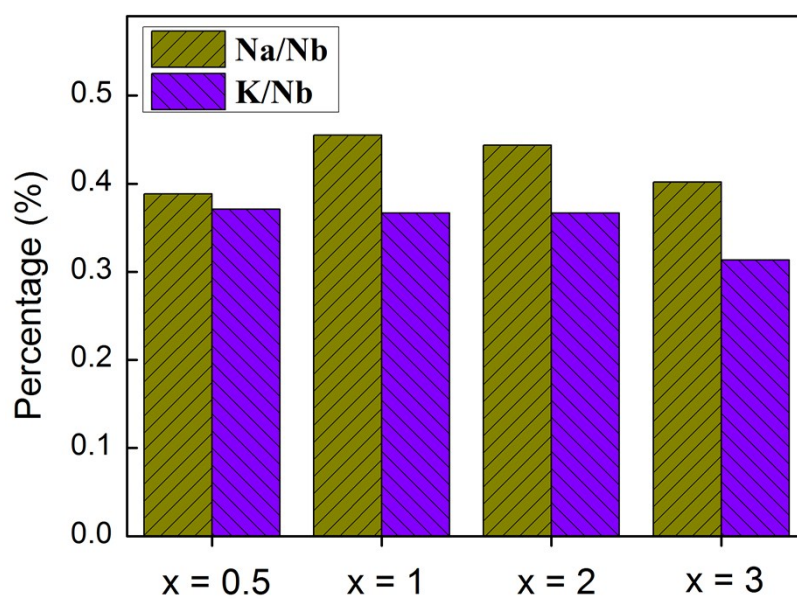

**Fig. S6** The percentages of Na/Nb and K/Nb in the KNN-Sm-x ceramics from the EDS analysis based on the SEM image.
